# Supplementary material
Source: Springer Nature journal article supplement (https://www.springermedizin.de/resource/supplementary/12885_2012_3767_MOESM1_ESM.pdf/9464372)

# NURR1 expression

**A**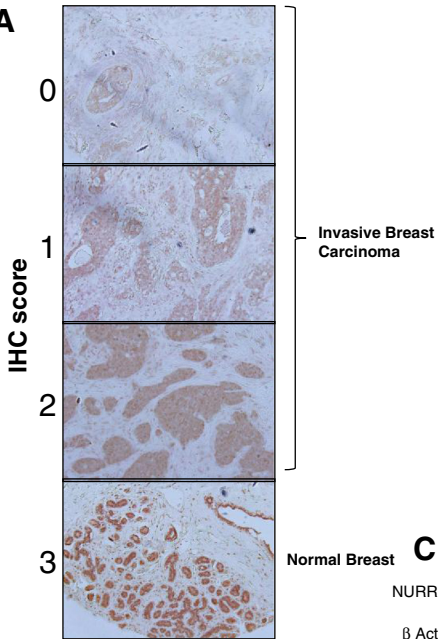**B**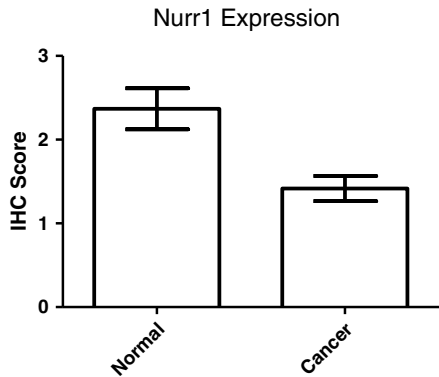**C**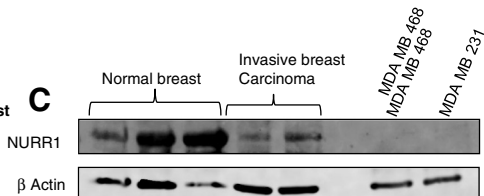

Supplement: MOESM1 [file 9464372]
